# Supplementary material for: Computational investigation of a covalent triazine framework (CTF-0) as an efficient electrochemical sensor
Source: Royal Society of Chemistry journal article supplement (doi:10.1039/d1ra08738j), 2022-01-01
Supplement: d1ra08738j1.pdf [file d1ra08738j1.pdf]

**Computational investigation of covalent triazine framework (CTF-0) as an efficient electrochemical sensor**

*Sehrish Sarfaraz<sup>a#</sup>, Muhammad Yar<sup>a#</sup>, Muhammad Ans<sup>b</sup>, Mazhar Amjad Gilani<sup>c</sup>, Ralf Ludwig<sup>d</sup>, Shabbir, Muhammad Ali Hashmi<sup>e</sup> Masroor Hussain<sup>g</sup>, & Khurshid Ayub<sup>a\*</sup>*

<sup>a</sup> Department of Chemistry, COMSATS University, Abbottabad Campus, KPK, Pakistan  
22060

<sup>b</sup> Department of Chemistry, University of Agriculture Faisalabad, 38000, Faisalabad,  
Pakistan

<sup>c</sup> Department of Chemistry, COMSATS University Islamabad, Lahore campus, 54600,  
Pakistan

<sup>d</sup> Department of Chemistry, University of Rostock, Dr.-Lorenz-Weg 1, 18059, Rostock,  
Germany

<sup>e</sup> Department of Physics, College of Science, King Khalid University, Abha, 61413, P.O. Box  
9004, Saudi Arabia

<sup>f</sup> Department of Chemistry, University of Education, Attock Campus, Attock, Punjab, 43600,  
Pakistan

<sup>g</sup> Department of Data Science, Ghulam Ishaq Khan Institute of Engineering Sciences

\*Corresponding author.

Tel: +92-992-383591.

E-mail: [khurshid@cuiatd.edu.pk](mailto:khurshid@cuiatd.edu.pk) (K.A.)

# Sehrish Sarfaraz and Muhmmad Yar have equal contribution for first authorship

**O<sub>3</sub>@CTF-0**

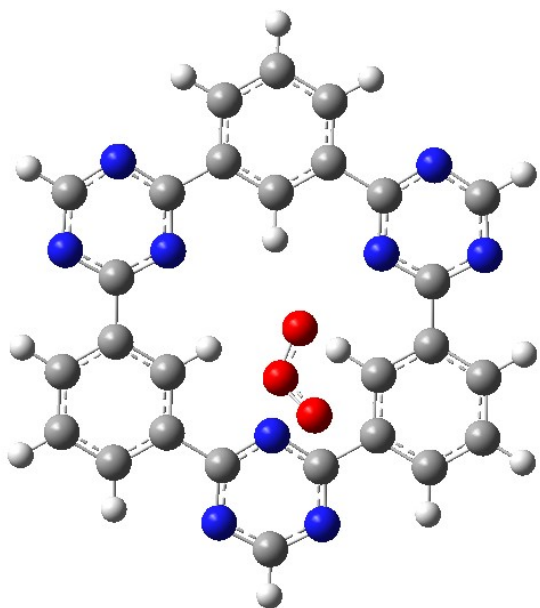

**-5.01 kcal/mol**

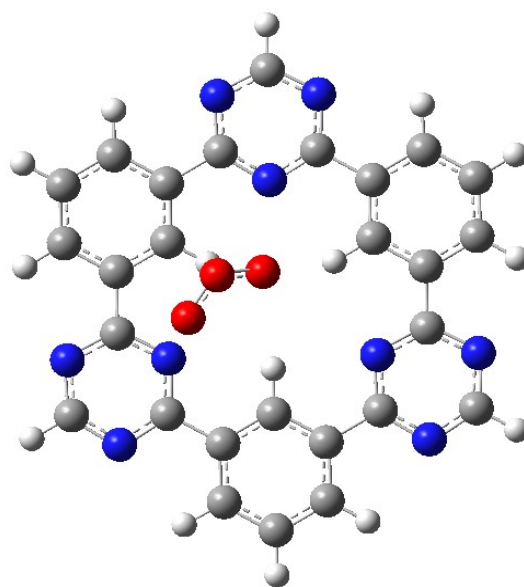

**-4.86 kcal/mol**

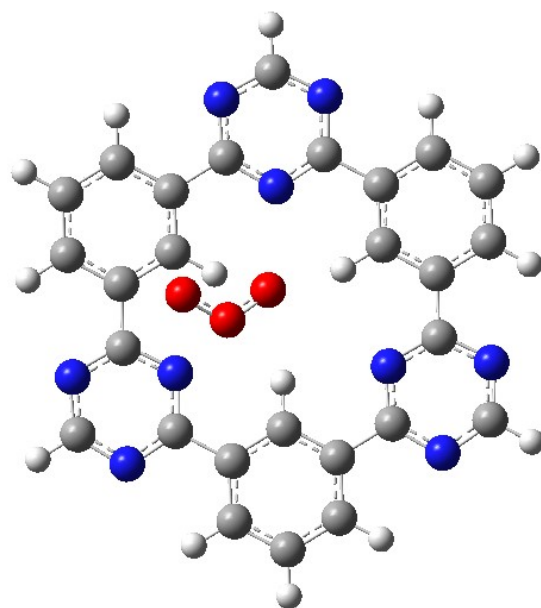

**-4.56 kcal/mol**

**NO@CTF-0**

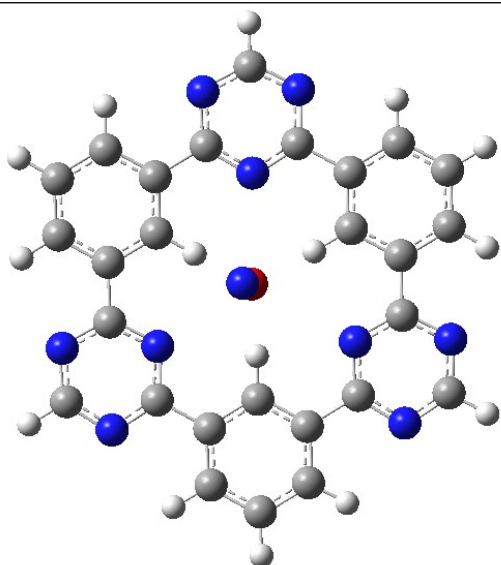

**-3.38 kcal/mol**

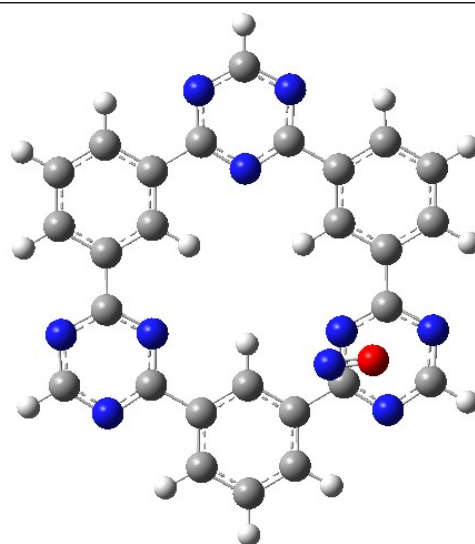

**-3.02 kcal/mol**

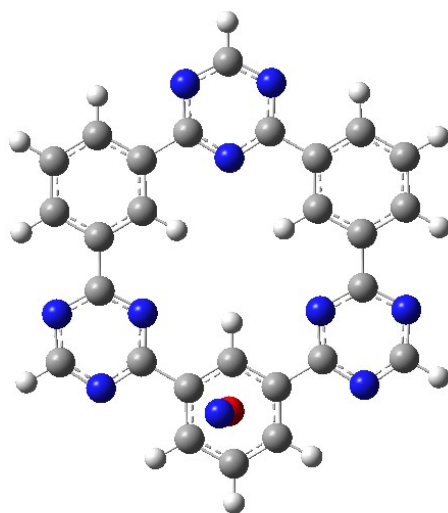

**-2.98 kcal/mol**

**SO<sub>2</sub>@CTF-0**

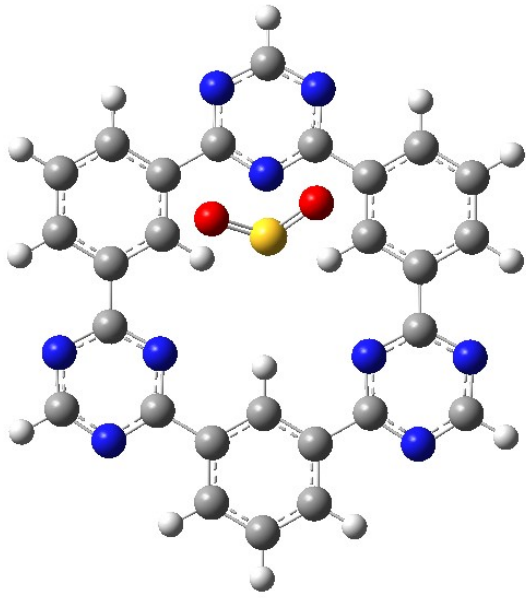

-6.67 kcal/mol

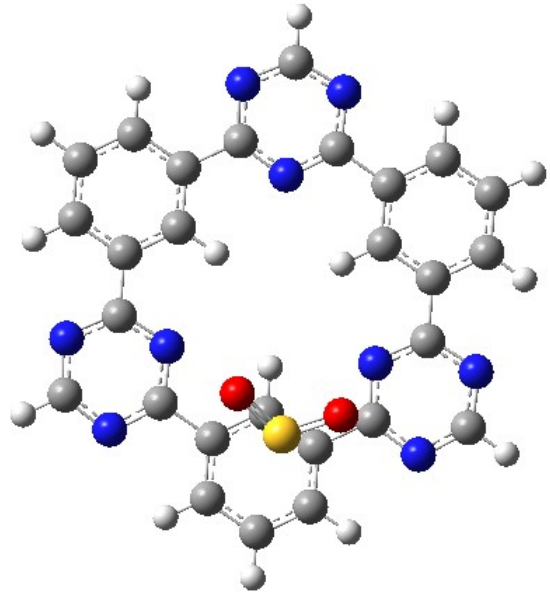

-6.21 kcal/mol

$\text{SO}_3@$ CTF-0

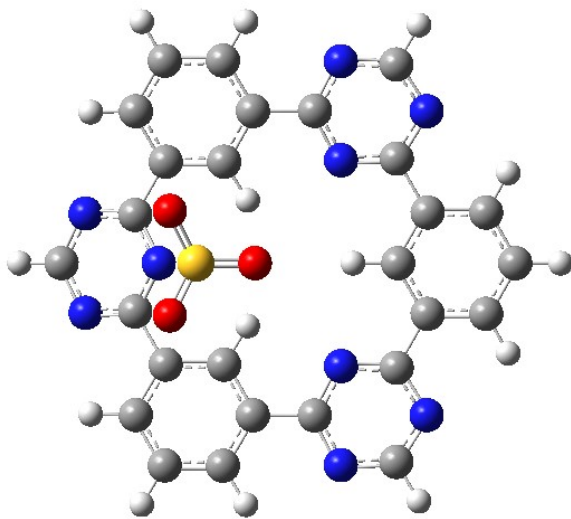

-12.75 kcal/mol

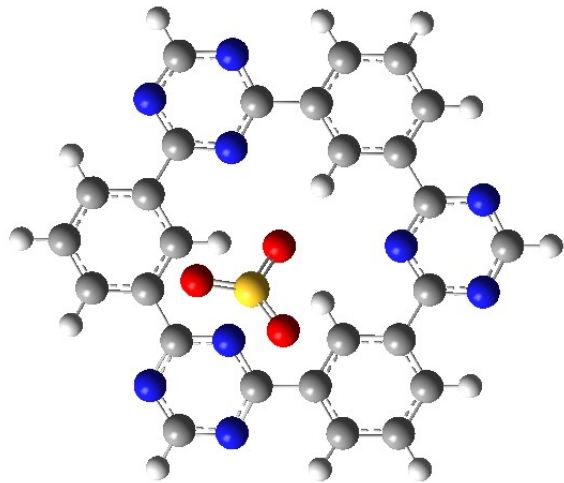

-12.27 kcal/mol

$\text{CO}_2@$ CTF-0

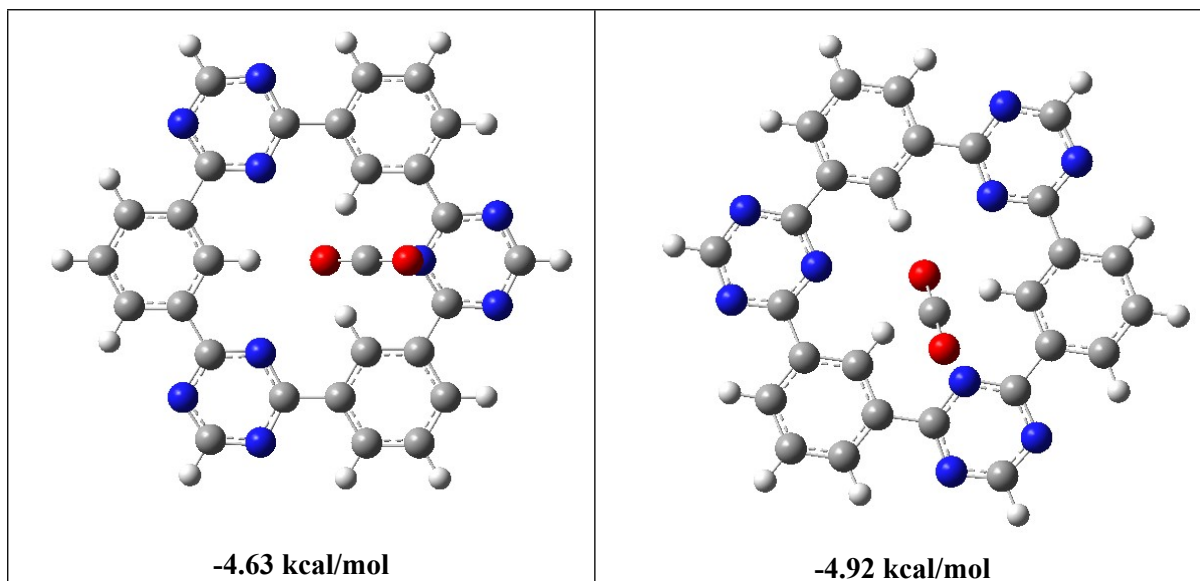

**Figure S1: Possible orientations of studies analytes@CTF-0 complexes and their respective interaction energies**

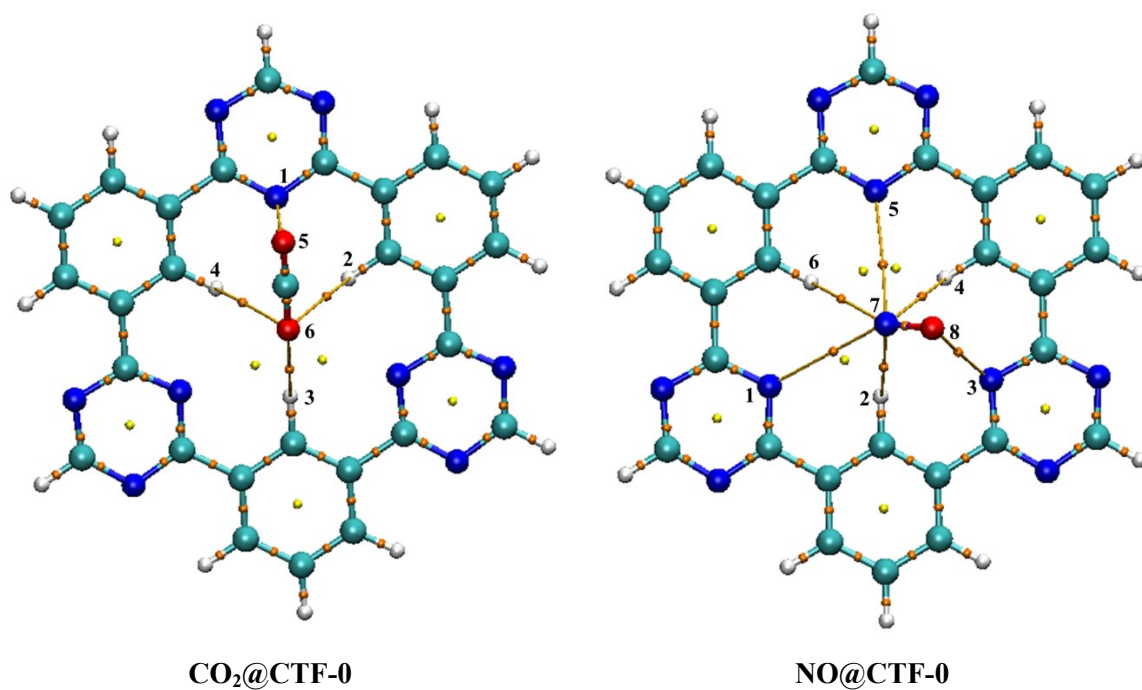

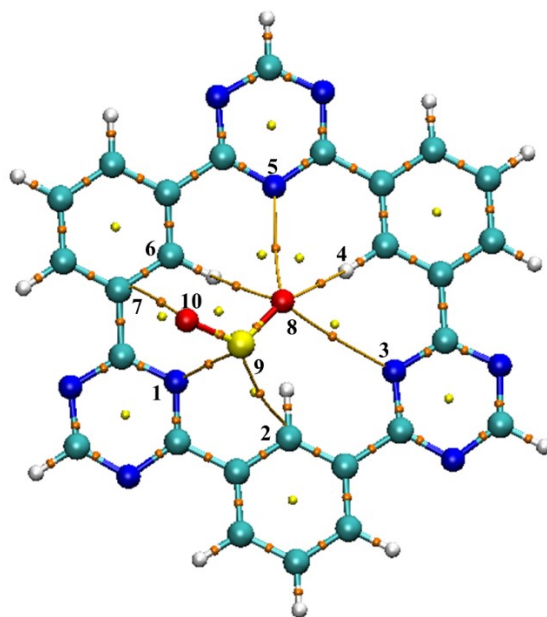

SO<sub>2</sub>@CTF-0

Figure S2: QTAIM analysis results of CO<sub>2</sub>@CTF-0, NO@CTF-0 and SO<sub>2</sub>@CTF-0 complexes

Table S1: Recovery response time for complexes (analytes@CTF-0) at three different temperatures (298, 250 and 400 K).

| Analytes@surface       | Recovery Time ( $\tau$ ) seconds |                          |                          |
|------------------------|----------------------------------|--------------------------|--------------------------|
|                        | 298 K                            | 350 K                    | 400 K                    |
| O <sub>3</sub> @CTF-0  | 9.72 x 10 <sup>-09</sup>         | 2.48 x 10 <sup>-09</sup> | 9.35 x 10 <sup>-10</sup> |
| NO@CTF-0               | 4.74 x 10 <sup>-10</sup>         | 1.90 x 10 <sup>-10</sup> | 9.85 x 10 <sup>-11</sup> |
| SO <sub>2</sub> @CTF-0 | 1.47 x 10 <sup>-07</sup>         | 2.51 x 10 <sup>-08</sup> | 7.08 x 10 <sup>-09</sup> |
| SO <sub>3</sub> @CTF-0 | 3.39 x 10 <sup>-03</sup>         | 1.30 x 10 <sup>-04</sup> | 1.26 x 10 <sup>-05</sup> |
| CO <sub>2</sub> @CTF-0 | 4.87 x 10 <sup>-09</sup>         | 1.37 x 10 <sup>-09</sup> | 5.58 x 10 <sup>-10</sup> |

### Cartesian Coordinates

#### CTF-0

0 1

|   |             |             |            |
|---|-------------|-------------|------------|
| C | -5.46961000 | 0.00000200  | 0.00000000 |
| N | -4.87004300 | -1.18444300 | 0.00000000 |
| N | -4.87004300 | 1.18444700  | 0.00000000 |

|   |             |             |            |
|---|-------------|-------------|------------|
| C | -3.53155400 | -1.13180500 | 0.00000000 |
| C | -3.53155400 | 1.13180800  | 0.00000000 |
| N | -2.82614600 | 0.00000100  | 0.00000000 |
| C | -2.78900100 | -2.41411100 | 0.00000000 |
| C | -3.48662400 | -3.62636200 | 0.00000000 |
| C | -1.39408300 | -2.41362200 | 0.00000000 |
| C | -2.78854000 | -4.82930800 | 0.00000000 |
| C | -0.69666100 | -3.62160000 | 0.00000000 |
| C | -1.39754600 | -4.83209200 | 0.00000000 |
| C | 0.78539400  | -3.62334300 | 0.00000000 |
| N | 1.40890600  | -4.80876100 | 0.00000000 |
| N | 1.41319500  | -2.44678700 | 0.00000000 |
| C | 2.73454900  | -4.73626300 | 0.00000000 |
| C | 2.74606500  | -2.49196200 | 0.00000000 |
| N | 3.46087400  | -3.62491200 | 0.00000000 |
| C | 3.48579900  | -1.20796800 | 0.00000000 |
| C | 4.88459000  | -1.20618300 | 0.00000000 |
| C | 2.78844800  | 0.00000000  | 0.00000000 |
| C | 5.57718300  | -0.00000200 | 0.00000000 |
| C | 3.48580200  | 1.20796500  | 0.00000000 |
| C | 4.88459300  | 1.20617900  | 0.00000000 |
| C | 2.74606800  | 2.49196100  | 0.00000000 |
| N | 3.46087500  | 3.62491100  | 0.00000000 |
| N | 1.41319700  | 2.44678600  | 0.00000000 |
| C | 2.73454900  | 4.73626300  | 0.00000000 |
| C | 0.78539600  | 3.62334000  | 0.00000000 |
| N | 1.40890700  | 4.80876000  | 0.00000000 |
| C | -0.69665900 | 3.62159900  | 0.00000000 |
| C | -1.39754200 | 4.83209300  | 0.00000000 |
| C | -1.39408200 | 2.41362200  | 0.00000000 |

|   |             |             |            |
|---|-------------|-------------|------------|
| C | -2.78853600 | 4.82931000  | 0.00000000 |
| C | -2.78900100 | 2.41411200  | 0.00000000 |
| C | -3.48662100 | 3.62636500  | 0.00000000 |
| H | -6.55445300 | 0.00000200  | 0.00000000 |
| H | -4.56799900 | -3.60936700 | 0.00000000 |
| H | -0.85496600 | -1.47764800 | 0.00000000 |
| H | -3.32949500 | -5.76680000 | 0.00000000 |
| H | -0.84276300 | -5.76030100 | 0.00000000 |
| H | 3.27631800  | -5.67599400 | 0.00000000 |
| H | 5.41071700  | -2.15097600 | 0.00000000 |
| H | 1.70819100  | 0.00000200  | 0.00000000 |
| H | 6.65962800  | -0.00000600 | 0.00000000 |
| H | 5.41071900  | 2.15097300  | 0.00000000 |
| H | 3.27631900  | 5.67599300  | 0.00000000 |
| H | -0.84275700 | 5.76030000  | 0.00000000 |
| H | -0.85496500 | 1.47764800  | 0.00000000 |
| H | -3.32949200 | 5.76680100  | 0.00000000 |
| H | -4.56799700 | 3.60937200  | 0.00000000 |

### **O<sub>3</sub>@CTF-0**

0 1

|   |             |             |             |
|---|-------------|-------------|-------------|
| C | -4.67833600 | -2.60557900 | -0.52645400 |
| N | -3.58766800 | -3.35955500 | -0.45312600 |
| N | -4.72027000 | -1.27903600 | -0.50312100 |
| C | -2.44228100 | -2.67511400 | -0.34296500 |
| C | -3.52539500 | -0.68564300 | -0.38742700 |
| N | -2.36706800 | -1.34329600 | -0.30270000 |
| C | -1.18041800 | -3.44666200 | -0.25696200 |
| C | -1.21763200 | -4.84490100 | -0.22595700 |



|   |             |             |             |
|---|-------------|-------------|-------------|
| C | 0.04536800  | -2.78190100 | -0.21368800 |
| C | -0.03330700 | -5.56955600 | -0.14811300 |
| C | 1.23155500  | -3.51238500 | -0.14045700 |
| C | 1.19055300  | -4.90969100 | -0.10621600 |
| C | 2.53518000  | -2.80781600 | -0.10442400 |
| N | 3.64650300  | -3.55206900 | -0.03422200 |
| N | 2.52538700  | -1.47555300 | -0.14604700 |
| C | 4.77632500  | -2.85465700 | -0.01075700 |
| C | 3.71718600  | -0.87807800 | -0.11134700 |
| N | 4.88452300  | -1.53209900 | -0.04530800 |
| C | 3.75395800  | 0.60255700  | -0.14617600 |
| C | 4.98205400  | 1.27194200  | -0.14819900 |
| C | 2.56358000  | 1.32958100  | -0.17013600 |
| C | 5.01469900  | 2.66222600  | -0.17441500 |
| C | 2.60018100  | 2.72380100  | -0.19362300 |
| C | 3.82980900  | 3.39014900  | -0.19484100 |
| C | 1.33803300  | 3.49970000  | -0.20489000 |
| N | 1.42531600  | 4.83579400  | -0.16087400 |
| N | 0.18874100  | 2.82509100  | -0.25210300 |
| C | 0.25725800  | 5.46641900  | -0.15933500 |
| C | -0.92346900 | 3.56007700  | -0.23397200 |
| N | -0.94232300 | 4.89850000  | -0.18840000 |
| C | -2.22502600 | 2.85216700  | -0.26021800 |
| C | -3.41848800 | 3.57810400  | -0.20756700 |
| C | -2.26026100 | 1.45959900  | -0.32879100 |
| C | -4.63966300 | 2.91115600  | -0.22178400 |
| C | -3.48622300 | 0.79317100  | -0.33694900 |
| C | -4.67870800 | 1.52296400  | -0.28571300 |
| H | -5.62694100 | -3.12393300 | -0.61563500 |
| H | -2.17545700 | -5.34547100 | -0.26399100 |

|   |             |             |             |
|---|-------------|-------------|-------------|
| H | 0.08092400  | -1.70233100 | -0.24132200 |
| H | -0.06402600 | -6.65124400 | -0.12216200 |
| H | 2.11980400  | -5.45995500 | -0.04864600 |
| H | 5.70023000  | -3.42042600 | 0.04325500  |
| H | 5.89574100  | 0.69379900  | -0.12794800 |
| H | 1.61481100  | 0.81336700  | -0.16281300 |
| H | 5.96557500  | 3.17925400  | -0.17677500 |
| H | 3.84015800  | 4.47146100  | -0.21053500 |
| H | 0.28585300  | 6.55041700  | -0.12821500 |
| H | -3.37350300 | 4.65743000  | -0.15466200 |
| H | -1.33544400 | 0.90284000  | -0.38194000 |
| H | -5.56243000 | 3.47525700  | -0.17919300 |
| H | -5.62022500 | 0.99122400  | -0.29375100 |
| O | -1.15613100 | -0.44546400 | 2.17730200  |
| O | -0.17580200 | 0.22316600  | 1.82402700  |
| O | -2.15260000 | 0.16405700  | 2.58790800  |

**NO@CTF-0**

0 2

|   |             |            |             |
|---|-------------|------------|-------------|
| C | -0.04612900 | 5.47122900 | -0.16549900 |
| N | 1.13982500  | 4.87465700 | -0.17468600 |
| N | -1.22887500 | 4.86885100 | -0.14662400 |
| C | 1.09047400  | 3.53624000 | -0.15820300 |
| C | -1.17345900 | 3.53049300 | -0.13187100 |
| N | -0.03945900 | 2.82771700 | -0.13247500 |
| C | 2.37432300  | 2.79673000 | -0.16564800 |
| C | 3.58523800  | 3.49650500 | -0.14696000 |
| C | 2.37619300  | 1.40208700 | -0.18756900 |
| C | 4.78925700  | 2.80046800 | -0.14633800 |

|   |             |             |             |
|---|-------------|-------------|-------------|
| C | 3.58524900  | 0.70684300  | -0.18191900 |
| C | 4.79437000  | 1.40948600  | -0.16203900 |
| C | 3.58857600  | -0.77486800 | -0.18903200 |
| N | 4.77479300  | -1.39660500 | -0.19613000 |
| N | 2.41255100  | -1.40431300 | -0.18377700 |
| C | 4.70452600  | -2.72227400 | -0.19668300 |
| C | 2.46044600  | -2.73706000 | -0.18261900 |
| N | 3.59431900  | -3.45021100 | -0.18919700 |
| C | 1.17775800  | -3.47912500 | -0.16736900 |
| C | 1.17930800  | -4.87779300 | -0.14939600 |
| C | -0.03188300 | -2.78431500 | -0.16622800 |
| C | -0.02501800 | -5.57315000 | -0.12898200 |
| C | -1.23792200 | -3.48491600 | -0.14111800 |
| C | -1.23283700 | -4.88341100 | -0.12355500 |
| C | -2.52350700 | -2.74782200 | -0.12837400 |
| N | -3.65475900 | -3.46496900 | -0.11499900 |
| N | -2.47994000 | -1.41508400 | -0.12743800 |
| C | -4.76727900 | -2.74047800 | -0.09960200 |
| C | -3.65765900 | -0.78931400 | -0.10999500 |
| N | -4.84189100 | -1.41507800 | -0.09547900 |
| C | -3.65838100 | 0.69237700  | -0.10531800 |
| C | -4.86969800 | 1.39127100  | -0.08396600 |
| C | -2.45098600 | 1.39066700  | -0.12086300 |
| C | -4.86891900 | 2.78224500  | -0.07821700 |
| C | -2.45396300 | 2.78565400  | -0.11437700 |
| C | -3.66698400 | 3.48174000  | -0.09342000 |
| H | -0.04891200 | 6.55600200  | -0.17592700 |
| H | 3.56614400  | 4.57773800  | -0.13192700 |
| H | 1.44145900  | 0.86080700  | -0.20690500 |
| H | 5.72580100  | 3.34282400  | -0.13110500 |

|   |             |             |             |
|---|-------------|-------------|-------------|
| H | 5.72341000  | 0.85612200  | -0.15798900 |
| H | 5.64505100  | -3.26257400 | -0.20354500 |
| H | 2.12540700  | -5.40150000 | -0.15128000 |
| H | -0.03577800 | -1.70383900 | -0.18523200 |
| H | -0.02230100 | -6.65550900 | -0.11552700 |
| H | -2.17637100 | -5.41145000 | -0.10498800 |
| H | -5.70602600 | -3.28382300 | -0.08906300 |
| H | -5.79694500 | 0.83501200  | -0.07187000 |
| H | -1.51524900 | 0.85158500  | -0.13530300 |
| H | -5.80697300 | 3.32194900  | -0.06146500 |
| H | -3.65137100 | 4.56311500  | -0.08929500 |
| N | 0.04235600  | 0.00048000  | 1.99481600  |
| O | 1.03170500  | -0.08770500 | 2.56553700  |

**SO<sub>2</sub>@CTF-0**

0 1

|   |             |            |             |
|---|-------------|------------|-------------|
| C | 1.49198500  | 5.31192400 | -0.04752300 |
| N | 0.19704000  | 5.02145700 | -0.09341000 |
| N | 2.49469200  | 4.44312400 | -0.09195600 |
| C | -0.07473200 | 3.71534300 | -0.21029600 |
| C | 2.11798100  | 3.16227900 | -0.20366900 |
| N | 0.84996000  | 2.75822100 | -0.27872500 |
| C | -1.49770400 | 3.30655100 | -0.26836100 |
| C | -2.51055200 | 4.26680900 | -0.19341300 |
| C | -1.82579300 | 1.95750000 | -0.39427400 |
| C | -3.84520000 | 3.87681000 | -0.24906600 |
| C | -3.16468400 | 1.56928400 | -0.44384300 |
| C | -4.17664400 | 2.53315000 | -0.37760100 |
| C | -3.51569400 | 0.14093900 | -0.57160400 |

|   |             |             |             |
|---|-------------|-------------|-------------|
| N | -4.77936500 | -0.17510900 | -0.87966900 |
| N | -2.55083000 | -0.76425100 | -0.36828500 |
| C | -5.01797000 | -1.47627900 | -0.98551400 |
| C | -2.89324500 | -2.04398700 | -0.54410900 |
| N | -4.12844500 | -2.45436100 | -0.85038300 |
| C | -1.84025900 | -3.07035300 | -0.37854500 |
| C | -2.19032300 | -4.42107800 | -0.27689600 |
| C | -0.49771800 | -2.69278700 | -0.33316600 |
| C | -1.19929100 | -5.38345100 | -0.11766900 |
| C | 0.49363000  | -3.66162800 | -0.17818800 |
| C | 0.14015300  | -5.00964100 | -0.06799900 |
| C | 1.91980200  | -3.25730600 | -0.13680400 |
| N | 2.84097600  | -4.22276200 | -0.03094100 |
| N | 2.19607500  | -1.95622800 | -0.20887700 |
| C | 4.09498200  | -3.78404700 | -0.00878400 |
| C | 3.48842300  | -1.62727600 | -0.16532400 |
| N | 4.48581600  | -2.51748800 | -0.07056400 |
| C | 3.84302700  | -0.19136800 | -0.22480500 |
| C | 5.18587600  | 0.19274200  | -0.30249600 |
| C | 2.83934200  | 0.77742100  | -0.19622800 |
| C | 5.51972600  | 1.54161900  | -0.35449700 |
| C | 3.17938300  | 2.12949400  | -0.24488800 |
| C | 4.52265700  | 2.51073900  | -0.32215900 |
| H | 1.75591900  | 6.36058100  | 0.03852800  |
| H | -2.23796300 | 5.30860800  | -0.09231100 |
| H | -1.03442700 | 1.22427300  | -0.45926900 |
| H | -4.62785500 | 4.62203700  | -0.18921200 |
| H | -5.20926100 | 2.21462100  | -0.42180200 |
| H | -6.03664500 | -1.77023100 | -1.21396900 |
| H | -3.23485400 | -4.69832900 | -0.32376000 |

|   |             |             |             |
|---|-------------|-------------|-------------|
| H | -0.21529800 | -1.65364800 | -0.43308300 |
| H | -1.47097600 | -6.42770100 | -0.03258300 |
| H | 0.92153600  | -5.74790200 | 0.05137800  |
| H | 4.87454700  | -4.53427500 | 0.06871500  |
| H | 5.95083900  | -0.57175500 | -0.32038300 |
| H | 1.80285500  | 0.48286300  | -0.11506900 |
| H | 6.55872700  | 1.83847000  | -0.41834800 |
| H | 4.76780600  | 3.56371200  | -0.35487700 |
| S | -1.33178000 | -0.47991300 | 2.19139500  |
| O | -0.08473100 | 0.17739300  | 1.83628900  |
| O | -2.41787500 | 0.35993800  | 2.66992400  |

**SO<sub>3</sub>@CTF-0**

0 1

|   |             |             |             |
|---|-------------|-------------|-------------|
| C | -4.98062900 | 0.00029000  | -1.38924500 |
| N | -4.41023100 | -1.18187800 | -1.19176400 |
| N | -4.41009100 | 1.18240100  | -1.19172400 |
| C | -3.22369400 | -1.15018300 | -0.58590300 |
| C | -3.22356100 | 1.15055300  | -0.58589900 |
| N | -2.66326800 | 0.00014000  | -0.15190000 |
| C | -2.49604700 | -2.41601300 | -0.42488200 |
| C | -3.20800300 | -3.61957100 | -0.37924100 |
| C | -1.10219300 | -2.41753300 | -0.37491200 |
| C | -2.52047800 | -4.81998300 | -0.25552100 |
| C | -0.41770100 | -3.62534800 | -0.25878700 |
| C | -1.12964400 | -4.82639000 | -0.19498600 |
| C | 1.06338400  | -3.62859800 | -0.19506200 |
| N | 1.68227000  | -4.81125700 | -0.09809300 |
| N | 1.68726500  | -2.45246100 | -0.23605900 |

|   |             |             |             |
|---|-------------|-------------|-------------|
| C | 3.00728200  | -4.73471500 | -0.04072500 |
| C | 3.01802500  | -2.49209200 | -0.15642900 |
| N | 3.73114800  | -3.62249400 | -0.06040800 |
| C | 3.75415900  | -1.20723400 | -0.17663100 |
| C | 5.15248100  | -1.20576500 | -0.21261400 |
| C | 3.05426600  | -0.00017000 | -0.15496600 |
| C | 5.84563800  | -0.00033900 | -0.23173600 |
| C | 3.75430400  | 1.20681000  | -0.17664500 |
| C | 5.15262700  | 1.20517500  | -0.21263900 |
| C | 3.01831900  | 2.49175800  | -0.15648200 |
| N | 3.73159000  | 3.62210800  | -0.06081000 |
| N | 1.68755200  | 2.45226100  | -0.23586700 |
| C | 3.00785300  | 4.73440300  | -0.04118100 |
| C | 1.06380600  | 3.62848400  | -0.19502600 |
| N | 1.68283200  | 4.81108400  | -0.09836800 |
| C | -0.41728400 | 3.62538000  | -0.25864400 |
| C | -1.12909800 | 4.82649300  | -0.19471400 |
| C | -1.10191000 | 2.41764900  | -0.37484200 |
| C | -2.51993500 | 4.82024100  | -0.25520100 |
| C | -2.49576700 | 2.41628700  | -0.42479000 |
| C | -3.20759300 | 3.61991400  | -0.37902000 |
| H | -5.98935600 | 0.00035900  | -1.78649600 |
| H | -4.28817700 | -3.59709400 | -0.42928000 |
| H | -0.53999600 | -1.49554600 | -0.42409400 |
| H | -3.06704200 | -5.75248000 | -0.20388800 |
| H | -0.58196700 | -5.75417600 | -0.10043800 |
| H | 3.54914800  | -5.67149800 | 0.03199300  |
| H | 5.67818100  | -2.15073400 | -0.22409000 |
| H | 1.97435600  | -0.00011000 | -0.10210800 |
| H | 6.92766000  | -0.00041000 | -0.26115100 |

|   |             |             |             |
|---|-------------|-------------|-------------|
| H | 5.67843200  | 2.15008400  | -0.22414300 |
| H | 3.54982400  | 5.67114000  | 0.03134000  |
| H | -0.58132000 | 5.75421300  | -0.10010600 |
| H | -0.53983200 | 1.49559400  | -0.42411700 |
| H | -3.06639600 | 5.75279200  | -0.20345700 |
| H | -4.28777100 | 3.59755700  | -0.42904500 |
| S | -1.77677100 | 0.00010400  | 1.85224100  |
| O | -2.39953500 | 1.24466700  | 2.25352100  |
| O | -2.39974500 | -1.24435800 | 2.25350900  |
| O | -0.36728400 | -0.00002200 | 1.51903400  |

**CO<sub>2</sub>@CTF-0**

0 1

|   |             |             |             |
|---|-------------|-------------|-------------|
| C | -2.84920700 | -4.73676200 | -0.08056800 |
| N | -1.52381000 | -4.81110500 | -0.11496200 |
| N | -3.57422000 | -3.62485800 | -0.08436400 |
| C | -0.90151100 | -3.62631200 | -0.16303600 |
| C | -2.85953800 | -2.49244200 | -0.13161900 |
| N | -1.52728900 | -2.44945700 | -0.17616700 |
| C | 0.58040500  | -3.62439600 | -0.20173100 |
| C | 1.28459400  | -4.83175600 | -0.16157800 |
| C | 1.27373100  | -2.41614700 | -0.27597300 |
| C | 2.67548500  | -4.82609400 | -0.19446500 |
| C | 2.66864300  | -2.41370900 | -0.30634700 |
| C | 3.36994700  | -3.62354000 | -0.26737800 |
| C | 3.40772000  | -1.13188400 | -0.38123500 |
| N | 4.73896600  | -1.18379600 | -0.51097700 |
| N | 2.70524600  | 0.00036900  | -0.30835400 |
| C | 5.33597500  | 0.00079600  | -0.56384300 |



|   |             |             |             |
|---|-------------|-------------|-------------|
| C | 3.40736100  | 1.13285400  | -0.38113800 |
| N | 4.73858600  | 1.18519500  | -0.51087500 |
| C | 2.66788900  | 2.41444900  | -0.30621300 |
| C | 3.36884800  | 3.62447600  | -0.26722300 |
| C | 1.27297400  | 2.41650100  | -0.27587600 |
| C | 2.67404900  | 4.82683500  | -0.19431300 |
| C | 0.57930800  | 3.62456300  | -0.20166300 |
| C | 1.28315700  | 4.83211500  | -0.16147100 |
| C | -0.90261400 | 3.62606300  | -0.16308000 |
| N | -1.52527400 | 4.81066900  | -0.11512500 |
| N | -1.52803900 | 2.44902300  | -0.17618900 |
| C | -2.85065500 | 4.73592600  | -0.08083400 |
| C | -2.86030500 | 2.49160100  | -0.13171900 |
| N | -3.57533300 | 3.62380300  | -0.08460600 |
| C | -3.59805000 | 1.20691100  | -0.13422600 |
| C | -4.99683100 | 1.20505900  | -0.13653800 |
| C | -2.89900700 | -0.00042500 | -0.13146500 |
| C | -5.68963300 | -0.00084800 | -0.13836800 |
| C | -3.59767800 | -1.20797800 | -0.13416600 |
| C | -4.99646300 | -1.20654600 | -0.13647600 |
| H | -3.39140900 | -5.67553900 | -0.04436600 |
| H | 0.73258800  | -5.75994000 | -0.10476300 |
| H | 0.72705600  | -1.48507800 | -0.31581000 |
| H | 3.21915100  | -5.76145600 | -0.16229700 |
| H | 4.45090500  | -3.60446700 | -0.29409400 |
| H | 6.41608400  | 0.00097000  | -0.66369500 |
| H | 4.44981200  | 3.60571600  | -0.29391700 |
| H | 0.72654600  | 1.48528000  | -0.31572500 |
| H | 3.21745500  | 5.76234800  | -0.16211500 |
| H | 0.73088200  | 5.76014000  | -0.10468100 |

|   |             |             |             |
|---|-------------|-------------|-------------|
| H | -3.39314500 | 5.67453900  | -0.04471100 |
| H | -5.52292000 | 2.14985700  | -0.13656700 |
| H | -1.81865100 | -0.00024300 | -0.11905100 |
| H | -6.77206600 | -0.00101300 | -0.14107000 |
| H | -5.52226200 | -2.15150500 | -0.13645500 |
| C | 1.28274900  | 0.00025600  | 2.34710400  |
| O | 0.18868900  | -0.00016900 | 1.95342700  |
| O | 2.36882300  | 0.00068000  | 2.76448100  |
